# Supplementary material for: Long non-coding RNA NEAT1 promotes the malignancy of laryngeal squamous cell carcinoma by regulating the microRNA-204-5p/SEMA4B axis
Source: PubMed Central journal article supplement — Oncol Lett. 2021 Sep 23;22(5):802. doi: 10.3892/ol.2021.13063 (PMC8477075; doi:10.3892/ol.2021.13063), 2021-09-23

Figure S1. Overexpression of miR-204-5p inhibits cell mobility. Representative images of (A) cell migration and (B) cell invasion assays in cells transfected with miR-204-5p mimics or NC. Magnification, x100. NC, negative control; miR, microRNA.

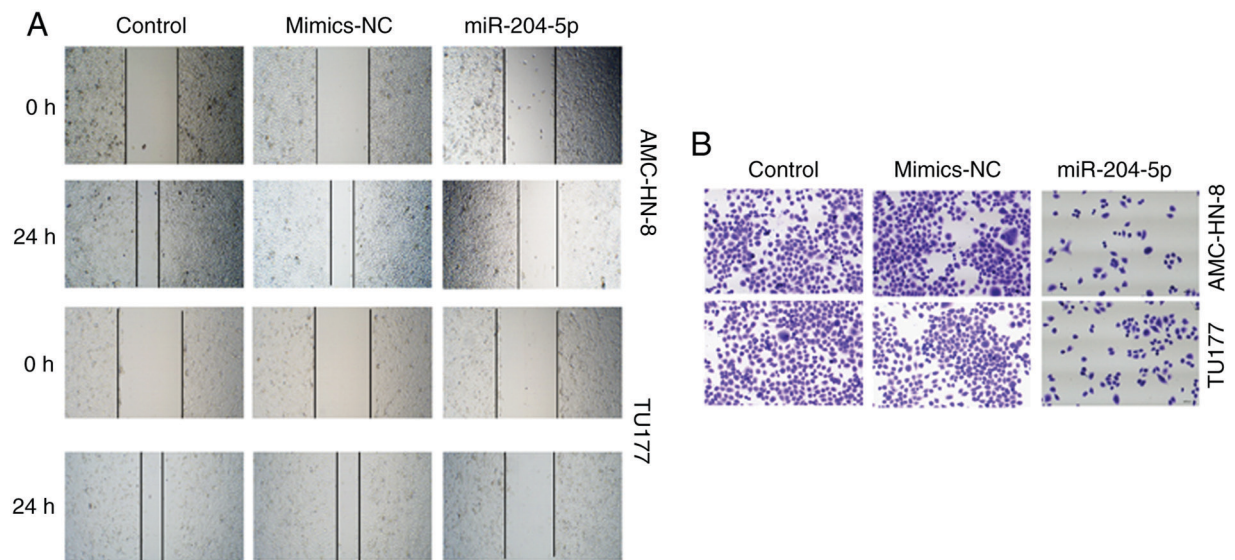

Figure S2. Inhibitory effects of si-NEAT1 on the motility of laryngeal squamous cell carcinoma are reversed by inhibiting miR-204-5p. Representative images of (A) cell migration and (B) cell invasion assay following transfection with siNEAT1 and miR-204-5p inhibitor alone or in combination. Magnification, x100. NC, negative control; miR, microRNA; si, short inhibiting.

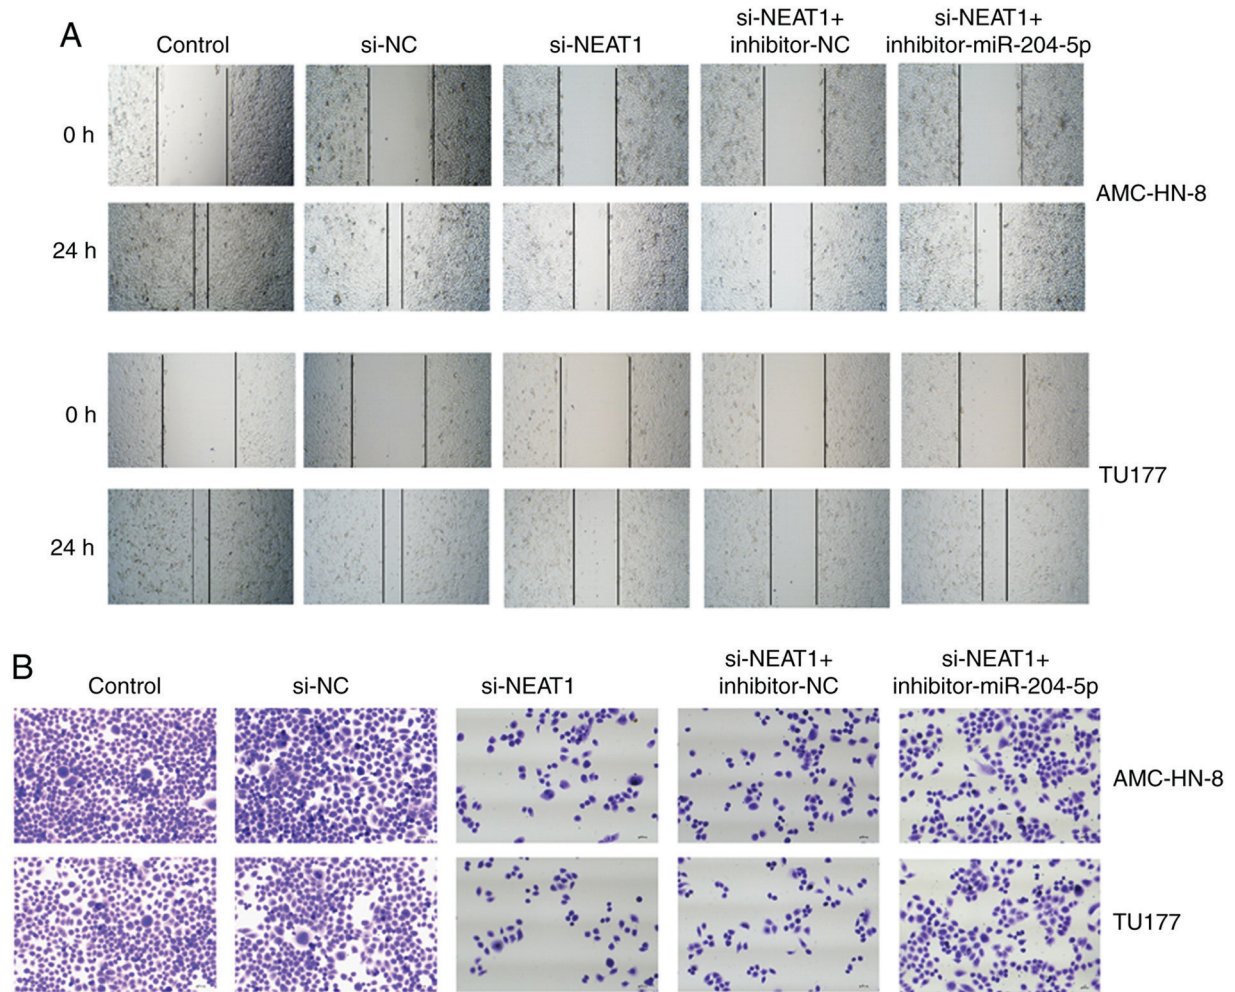

Figure S3. SEMA4B overexpression weakens the antitumor effect of miR-204-5p mimic in laryngeal squamous cell carcinoma. Representative images of (A) cell migration and (B) cell invasion assays following transfection with miR-204-5p mimics or SEMA4B overexpression vector. Magnification, x100.

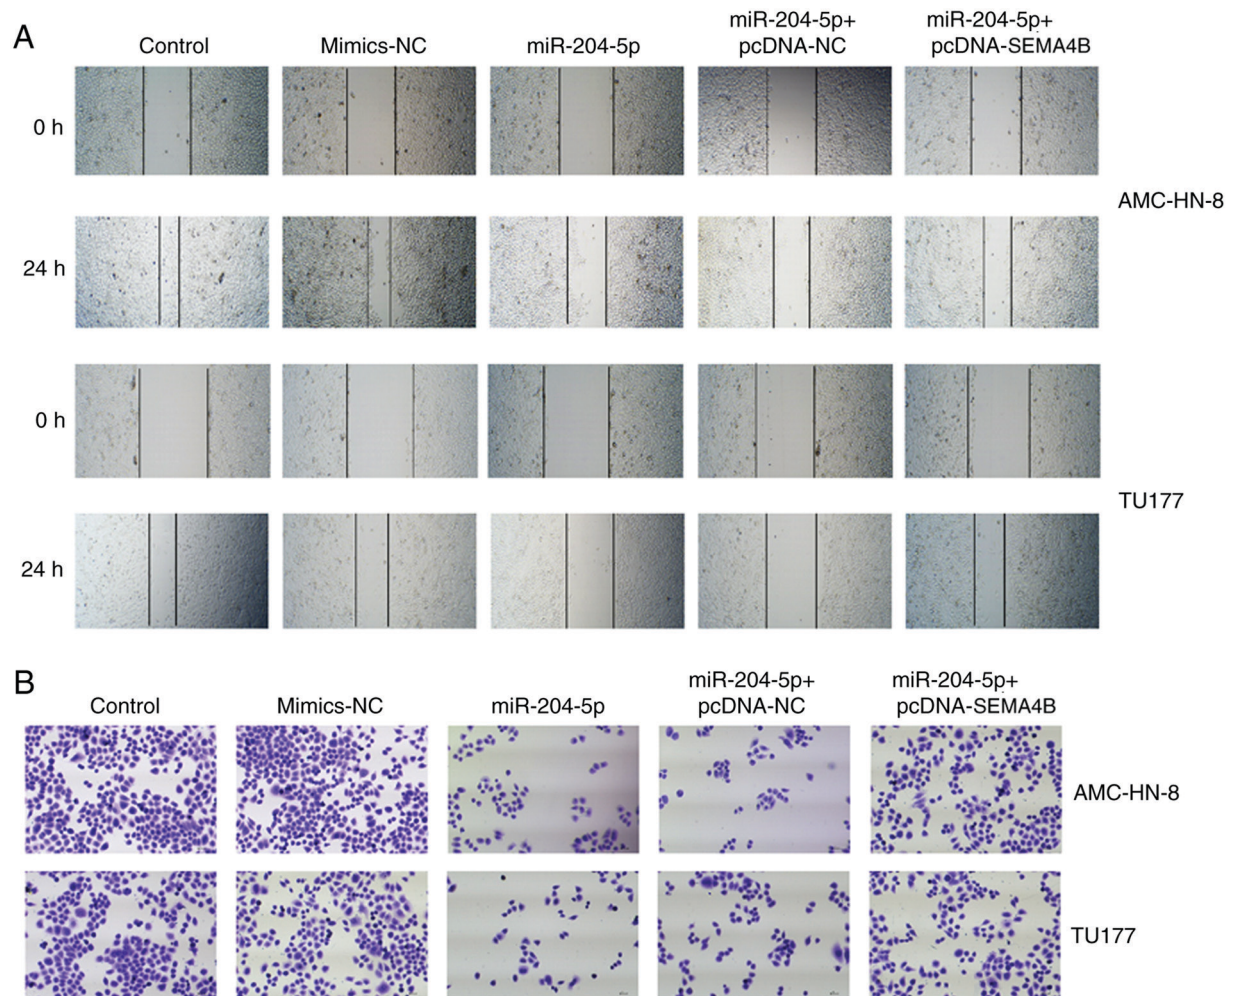

Supplement: Supplementary_Data.pdf [file Supplementary_Data.pdf]
